# Supplementary material
Source: Springer Nature journal article supplement (https://www.springermedizin.de/resource/supplementary/12904_2009_63_MOESM4_ESM.pdf/9518022)

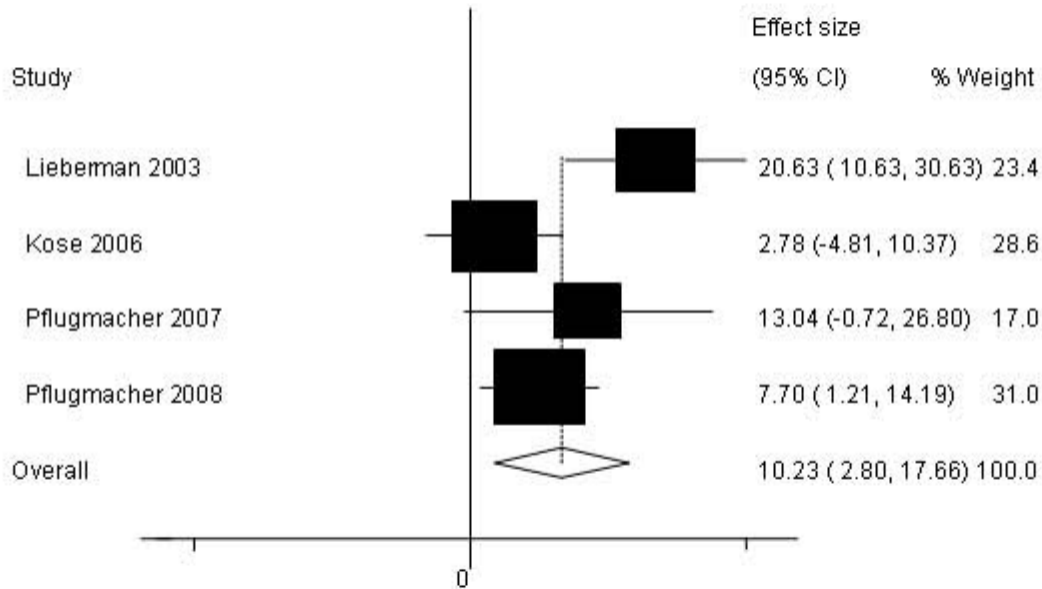

Supplement: MOESM4 [file 9518022]
